# Supplementary material
Source: publisher figshare collection journal article supplement (https://gsajournals.figshare.com/ndownloader/files/27743259)
Supplement: Supplementary file 1 [file 27743259]

| **Table S3.** Transcript Assembly using Iso-Seq (PacBio reads). | |
| --- | --- |
| Items | RNA-pooling transcripts |
| Total length | 15,832,955 |
| Max length | 5,989 |
| Average length | 842 |
| Sequence No. | 18,799 |
| Seq No (≥1,000bp) | 5,825 |
| Seq No (≥500bp) | 10,704 |
| Seq No (≥300bp) | 14,215 |
| Seq No (≥100bp) | 18,369 |
| GC content (%) | 47.19 |
| Total N insert | 0 |
